# Supplementary material
Source: MDPI journal article supplement (https://www.mdpi.com/1996-1073/15/15/5736)
Supplement: s1 [file s1]

**Table S1.** Photovoltaic parameters of each device with different nanotube diameters.

| Device | Nanotube Diameter (nm) | V <sub>oc</sub> (V) | J <sub>sc</sub> (mA/cm <sup>2</sup> ) | FF (%) | PCE (%) |
|--------|------------------------|---------------------|---------------------------------------|--------|---------|
| 1      | 100                    | 0.57                | 4.76                                  | 49.1   | 1.34    |
|        |                        | 0.53                | 4.97                                  | 49.9   | 1.32    |
|        |                        | 0.52                | 5.04                                  | 49.7   | 1.31    |
|        |                        | 0.57                | 4.83                                  | 49.8   | 1.38    |
|        |                        | 0.53                | 4.84                                  | 48.8   | 1.26    |
|        |                        | 0.54                | 4.81                                  | 49.5   | 1.29    |
|        |                        | 0.57                | 4.96                                  | 49.1   | 1.39    |
|        |                        | 0.56                | 5.04                                  | 50.5   | 1.43    |
|        |                        | 0.54                | 5.03                                  | 48.7   | 1.33    |
|        |                        | 0.54                | 4.94                                  | 50.2   | 1.34    |
| 2      | 80                     | 0.51                | 5.47                                  | 48.5   | 1.36    |
|        |                        | 0.53                | 5.43                                  | 49.6   | 1.43    |
|        |                        | 0.54                | 5.50                                  | 49.4   | 1.47    |
|        |                        | 0.51                | 5.43                                  | 49.1   | 1.36    |
|        |                        | 0.54                | 5.32                                  | 49.7   | 1.43    |
|        |                        | 0.55                | 5.35                                  | 49.1   | 1.44    |
|        |                        | 0.55                | 5.44                                  | 49.6   | 1.48    |
|        |                        | 0.54                | 5.18                                  | 48.4   | 1.36    |
|        |                        | 0.51                | 5.62                                  | 48.3   | 1.39    |
|        |                        | 0.54                | 5.44                                  | 48.2   | 1.41    |
| 3      | 60                     | 0.51                | 4.41                                  | 48.4   | 1.09    |
|        |                        | 0.56                | 4.45                                  | 47.9   | 1.19    |
|        |                        | 0.53                | 4.52                                  | 48.0   | 1.15    |
|        |                        | 0.53                | 4.59                                  | 48.2   | 1.17    |
|        |                        | 0.53                | 4.59                                  | 49.5   | 1.20    |
|        |                        | 0.56                | 4.29                                  | 48.1   | 1.16    |
|        |                        | 0.51                | 4.38                                  | 48.2   | 1.08    |
|        |                        | 0.56                | 4.53                                  | 47.2   | 1.19    |
|        |                        | 0.54                | 4.57                                  | 49.1   | 1.21    |
|        |                        | 0.56                | 4.46                                  | 48.7   | 1.22    |
| 4      | 40                     | 0.53                | 3.68                                  | 49.1   | 0.95    |
|        |                        | 0.53                | 3.75                                  | 47.5   | 0.94    |
|        |                        | 0.51                | 3.61                                  | 48.5   | 0.89    |
|        |                        | 0.54                | 3.51                                  | 49.0   | 0.92    |
|        |                        | 0.53                | 3.61                                  | 49.2   | 0.94    |
|        |                        | 0.53                | 3.50                                  | 47.5   | 0.88    |
|        |                        | 0.51                | 3.56                                  | 48.8   | 0.89    |
|        |                        | 0.53                | 3.47                                  | 48.7   | 0.90    |
|        |                        | 0.51                | 3.48                                  | 48.0   | 0.86    |
|        |                        | 0.48                | 3.44                                  | 48.8   | 0.81    |
| 5      | planar                 | 0.88                | 0.92                                  | 59.7   | 0.48    |
|        |                        | 0.93                | 0.64                                  | 61.2   | 0.37    |
|        |                        | 0.9                 | 0.65                                  | 60.3   | 0.36    |
|        |                        | 0.89                | 0.84                                  | 59.2   | 0.44    |
|        |                        | 0.87                | 0.84                                  | 60.2   | 0.44    |

|  |      |      |      |      |
|--|------|------|------|------|
|  | 0.91 | 0.70 | 60.4 | 0.39 |
|  | 0.91 | 0.70 | 59.8 | 0.39 |
|  | 0.93 | 0.83 | 59.9 | 0.46 |
|  | 0.89 | 0.71 | 60.3 | 0.39 |
|  | 0.91 | 0.91 | 59.1 | 0.49 |
